# Supplementary material for: Arsenic-Transformed Malignant Prostate Epithelia Can Convert Noncontiguous Normal Stem Cells into an Oncogenic Phenotype
Source: PubMed Central journal article supplement (PMC3385457; doi:10.1289/ehp.1204987), 2012-04-04
Supplement: ehp.1204987.s001.pdf [file ehp.1204987.s001.pdf]

## Supplemental Material

Arsenic-Transformed Malignant Prostate Epithelia Can Convert Noncontiguous Normal Stem Cells into an Oncogenic Phenotype

Yuanyuan Xu, Erik J. Tokar, Yang Sun and Michael P. Waalkes

### Table of Contents

| Page | Number                          | Content                                                                                                                                 |
|------|---------------------------------|-----------------------------------------------------------------------------------------------------------------------------------------|
| 2    | Supplemental Material, Table 1  | Genes and Primers for real time RT-PCR                                                                                                  |
| 3    | Supplemental Material, Figure 1 | Transcript level expression of WNT3 (A), K5 (B) and K18 (C) in NSCs after non-contact co-culture with MECs (Malignant Epithelial Cells) |

Supplemental Material, Table 1 Genes and Primers for real time RT-PCR

| Gene                                                                 | GenBank<br>Accession No. | Primers (5' → 3')                                                        |
|----------------------------------------------------------------------|--------------------------|--------------------------------------------------------------------------|
| P63<br>(Tumor protein 63)                                            | NM-003722                | Forward:<br>CCCCAAGCAGTGCCTCTACA<br>Reverse:<br>GGTGAATCGCACAGCATCAA     |
| NOTCH-1<br>(Notch homolog 1)                                         | NM_017617                | Forward:<br>CGGGTCCACCAGTTTGAATG<br>Reverse:<br>GTTGTATTGGTTCGGCACCAT    |
| OCT4/POU5F1<br>(OCTomer 4/POU class 5<br>homeobox 1)                 | NM_002701                | Forward:<br>CCCATTTCACCACACTCTACTC<br>Reverse:<br>CCAGAGCAGTGACAGGAACAGA |
| WNT3<br>(Wingless-type MMTV<br>integration site family,<br>member 3) | NM_030753                | Forward: GCCTGGTCCCCAAGCAA<br>Reverse:<br>GCTGGGCATGATCTCGATGT           |
| K5<br>(Keratin 5)                                                    | NM_000424                | Forward:<br>GTAGCAGCTCCAGCGTCAAAT<br>Reverse:<br>TTGGAAGGCAGTGACTIONGCA  |
| K18<br>(Keratin 18)                                                  | NM_26326                 | Forward:<br>GCCTTGGACAGCAGCAACTC<br>Reverse:<br>GACACCACTTTGCCATCCACTA   |
| PTEN<br>(Phosphatase and tensin<br>homolog)                          | NM_000314                | Forward:<br>TTCACATCCTACCCCTTTGCA<br>Reverse:<br>TCTGAGCATTCCCTCCATTCC   |
| E-CAD<br>(E-cadherin)                                                | Z18923                   | Forward:<br>CGGTGGTCAAAGAGCCCTTAC<br>Reverse:<br>CTCCGCCTCCTTCTTCATCATA  |

All primers are from Sigma-Aldrich Corp., The Woodlands, TX.

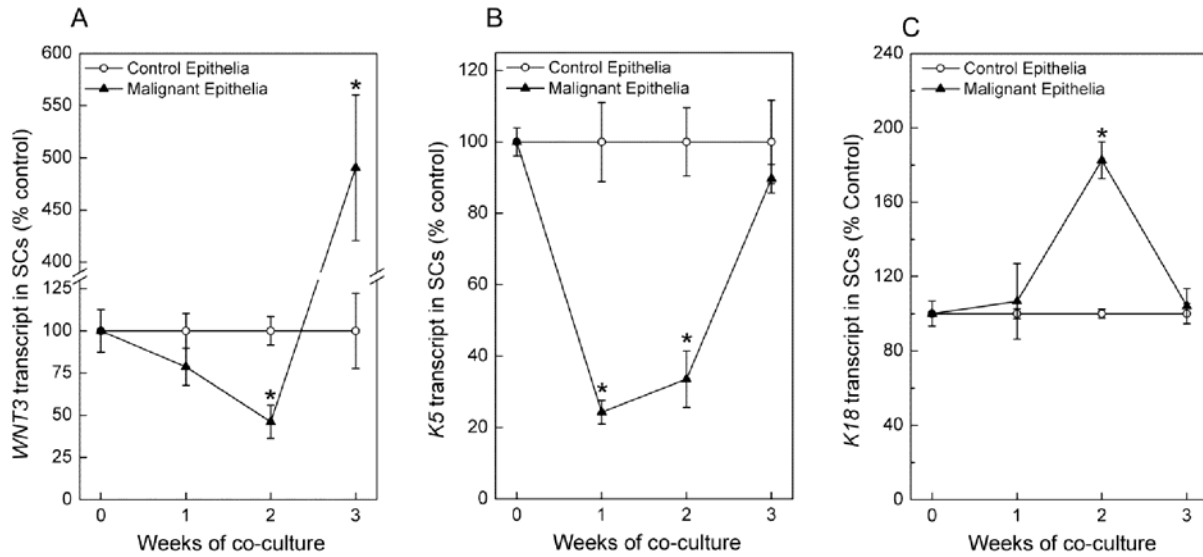

Supplemental Figure 1

Supplemental Material, Figure 1 Transcript level expression of WNT3 (A), K5 (B) and K18 (C) in NSCs after non-contact co-culture with MECs (Malignant Epithelial Cells). Transcript Levels of K18 showed an early increase of expression then a decrease, just opposite to the change of transcript levels of undifferentiated marker K5. Quantitative data are presented as mean  $\pm$  SEM, n = 3. \* P < 0.05, compared with time-matched control.
